# Supplementary material
Source: publisher site journal article supplement (https://www.dovepress.com/article/390583)
Supplement: Supplementary file 1 [file get_supplementary_file.php]

**Supplementary Materials**

**Medical cannabis use patterns for sleep disorders in Australia: results of the cross-sectional CAMS-20 survey**

Anastasia Suraev1,2,3,4, Llewellyn Mills5,6, Sarah V. Abelev1, Thomas R. Arkell7, Nicholas Lintzeris5,6*,and Iain S. McGregor1,2,3,4*

**These authors contributed equally to this work*

1 The University of Sydney, Lambert Initiative for Cannabinoid Therapeutics, Sydney, NSW, Australia

2 The University of Sydney, Faculty of Science, School of Psychology, Sydney, NSW, Australia

4 The University of Sydney, Brain and Mind Centre, Sydney, NSW, Australia

5 Drug and Alcohol Services, South East Sydney Local Health District, Sydney, NSW, Australia

6 Department of Addiction Medicine, Faculty Medicine and Health, University of Sydney, Sydney, NSW, Australia

7 Centre for Human Psychopharmacology, Swinburne University of Technology, Hawthorn, VIC, Australia

**Corresponding author**

Iain McGregor

Level 6, Building M02F, 94 Mallett Street Camperdown NSW 2050 Australia

[iain.mcgregor@sydney.edu.au](mailto:iain.mcgregor@sydney.edu.au)


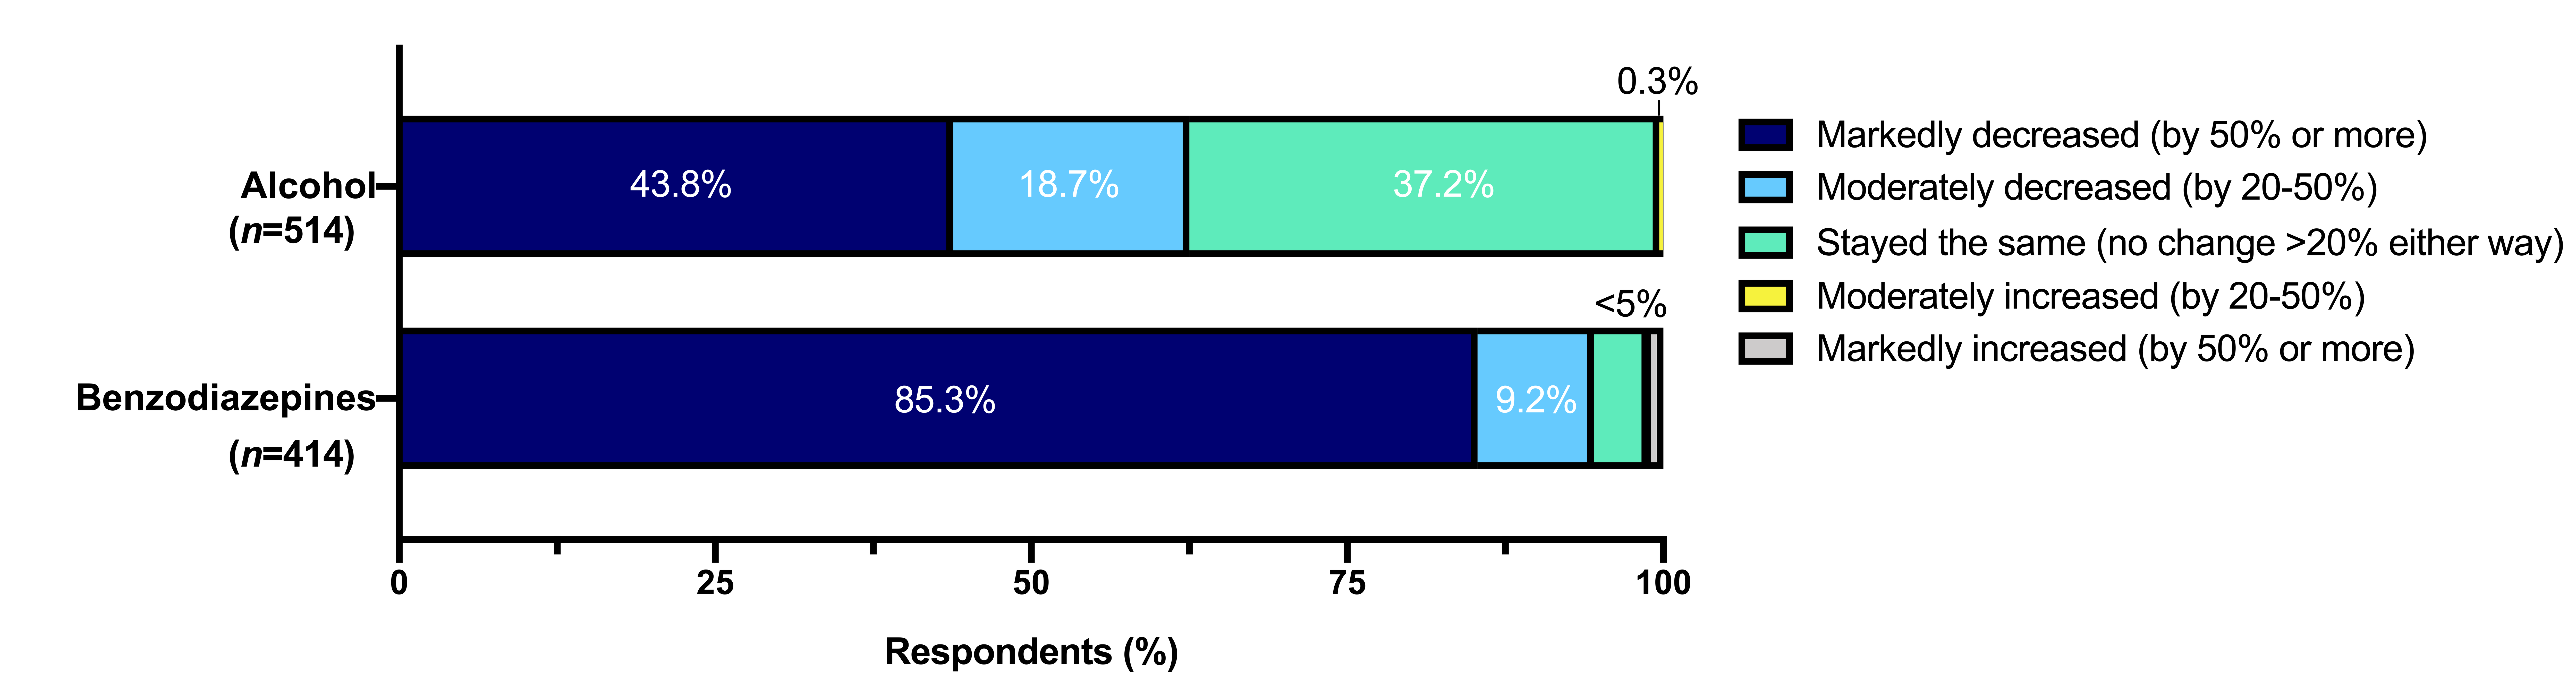


**Figure S1** Self-reported change in the use of alcohol (n=514) and benzodiazepine (n=414) after commencing use of medical cannabis for the treatment of a self-identified sleep disorder.

| **Table S1** Main health conditions treated with medical cannabis by respondents who reported using medical cannabis to treat a self-reported sleep disorder as a general health condition | | | | |
| --- | --- | --- | --- | --- |
|  |  |  | **Respondents**  **(n=982)** |
|  | **Rank** | **Condition** | **n (%)**a |
| **Pain** | 1  2  3  4 | **Total**  Back pain  Arthritis  Fibromyalgia  Neuropathy  All others**b** | **412 (42%)**  124 (12.6%)  79 (8.0%)  64 (6.5%)  52 (5.3%)  93 (9.3%) |
| **Mental Health/**  **Substance Use** | 1  2  3  4 | **Total**  Anxiety  PTSD  Depression  ADHD  All others**b** | **319 (32.5%)**  194 (19.8%)  54 (5.5%)  46 (4.7%)  12 (1.2%)  13 (1.3%) |
| **Sleep** | 1  2  3  4 | **Total**  Insomnia  Other**c**  Movement  Circadian  All others**b** | **165 (16.8%)**  116 (11.8%)  22 (2.2%)  12 (1.2%)  8 (0.8%)  7 (0.7%) |
| **Neurological** | 1  2  3  4 | **Total**  Other**c**  MS  Epilepsy  Autism  All others**b** | **68 (6.9%)**  30 (3.1%)  9 (0.9%)  8 (0.8%)  5 (0.5%)  16 (1.6%) |
| **Gastrointestinal** | 1  2  3  4 | **Total**  IBS  Other**c**  Crohn’s disease  Ulc. colitis | **22 (2.2%)**  7 (0.7%)  2 (0.2%)  7 (0.7%)  6 (0.6%) |
| **Cancer** | 1  2  3  4 | **Total**  Blood  Brain  Gastrointestinal  Breast  All others**b** | **23 (2.3%)**  7 (0.7%)  5 (0.5%)  4 (0.4%)  3 (0.3%)  4 (0.4%) |
| **Other** | 1  2  3  4 | **Total**  Gyn.  Other**c**  Immune  Diabetes  All others**b** | **55 (5.6%)**  23 (2.3%)  20 (2.0%)  9 (0.9%)  2 (0.2%)  1 (0.1%) |

**a**: percentages displayed represent the proportion each specific condition makes up of the entire group (i.e., 124 respondents reported ‘back pain’ as main condition, which represents 12.6% of the 982 respondents responded to this question) **b: “**All others” refers to all the other specific conditions that were listed as a main condition, but which were not in the top 4 most commonly. **c**: ‘Other’ refers to other conditions that could be classed under the overall main condition, but which were not listed in the drop-down list of specific conditions (e.g., other sleep conditions not listed). *Note:* Sum of respondents across all seven condition categories does not add up to n=982 because 82 respondents were in the ‘Prescribed and Illicit’ group and chose different main conditions for their prescribed and illicit medical cannabis product (e.g., main indication for prescribed product was ‘pain’ while an illicit product was used for ‘sleep’). *ADHD*, attention deficit hyperactivity disorder; *Circadian*, circadian rhythm disorder; *Gyn*, gynaelogical condition; *Immune*, auto-immune condition; *Movement*, sleep-related movement disorder; *MS*, multiple sclerosis; *PTSD*, post-traumatic stress disorder; *Ulc.Collitis*, ulcerative colitis.
